# Supplementary material for: Facile synthesis of hierarchical worm-like MoS2 structures assembled with nanosheets as anode for lithium ion batteries
Source: Royal Society of Chemistry journal article supplement (doi:10.1039/c5ra09028h), 2015-01-01
Supplement: c5ra09028h1.pdf [file c5ra09028h1.pdf]

# Facile synthesis of hierarchical worm-like MoS<sub>2</sub> structures assembled with nanosheets as anode for lithium ion batteries

Hui-Yuan Wang<sup>□</sup>, Bang-Yong Wang, Dong Wang, Lun Lu, Jin-Guo Wang\*, Qi-Chuan Jiang

Key Laboratory of Automobile Materials of Ministry of Education & School of Materials Science and Engineering, Nanling Campus, Jilin University, No. 5988 Renmin Street, Changchun 130025, PR China

\* Corresponding authors: Tel/Fax: +86 431 8509 4699

E-mail: wanghuiyuan@jlu.edu.cn; jgwang@jlu.edu.cn

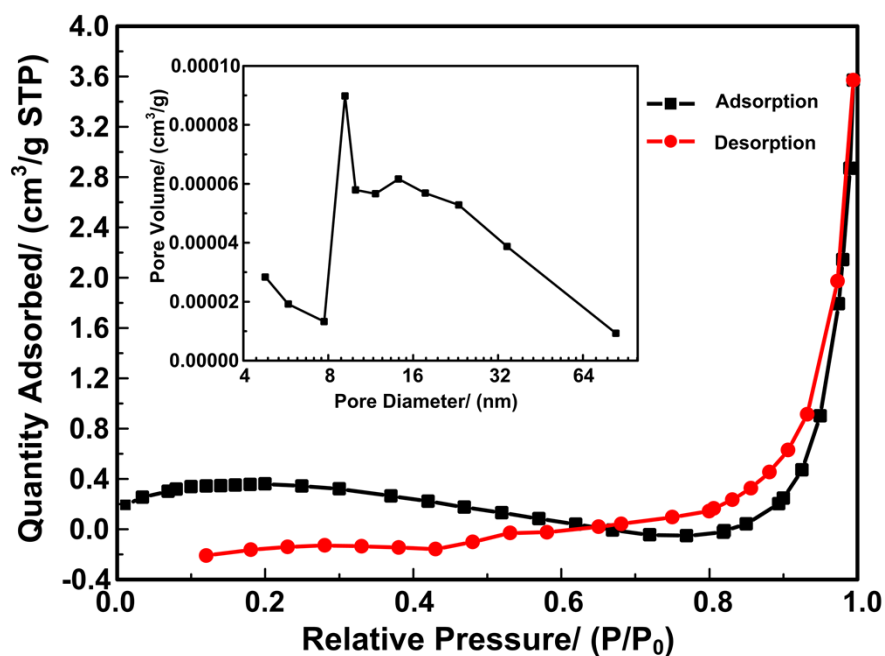

**Figure S1.** N<sub>2</sub> adsorption-desorption isotherm loop and pore-size distribution plots of bulk MoS<sub>2</sub>.

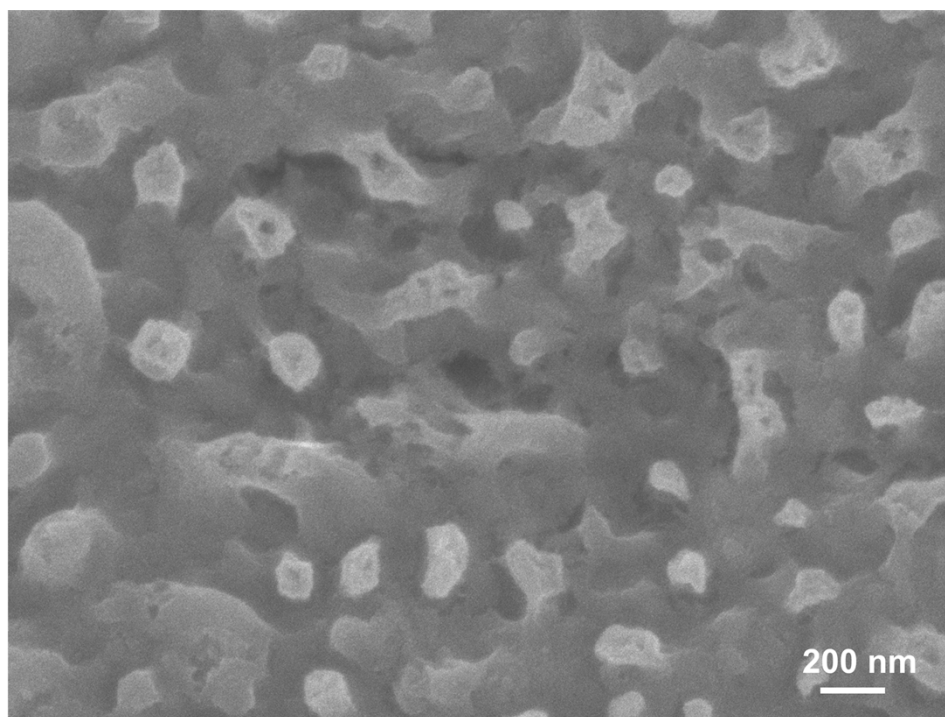

**Figure S2.** FESEM image of the electrode after 100 cycles at a current of 500 mA g<sup>-1</sup>.
